# Supplementary material
Source: Research Square preprint supplement (doi:10.21203/rs.3.rs-9803003/v1)
Supplement: Supplementary file 1 [file a91edf0f1db534eaaf591af4.docx]

*Perang Ampyak* Dialogue on Gigantic Trees and Collective Environmental Reasoning

| Karakter | Dialog | Terjemahan |
| --- | --- | --- |
| Warrior 1 | *Hééé kanca mandheg kanca mandheg.* | Fellow warriors, let us halt our advance for a moment. |
| Warrior 2 | *Kosik to…Kanca ngarep ki nèk ngabani mandheg aja ndadak. Sing ngarep mandheg sing mburi ngangseg mesakné sing ana tengah.* | Hey, front line, give us some warning next time! If you stop all of a sudden, the troops behind will run straight into you. Spare a thought for those caught in the middle! |
| Warrior 1 | *Mbok gamanmu kuwi aja mbok congolke nèng ngarep mesakné nèk nganti kena kancané malah mbilahèni.* | Don't thrust your weapon forward like that! You may hit your fellow warriors and put them in danger! |
| Warrior 2 | *Jan-jané ki ana apa to?* | What is the matter? Why has our advance suddenly come to a halt? |
| Warrior 1 | *Kaé lho sawangen ngarep kae dalané ki rusak ora kena diliwati.* | Look ahead! The road before us has been damaged. We cannot proceed any further. |
| Warrior 2 | *Ora kena diliwati piye to?* | We cannot pass through? |
| Warrior 1 | *Mbok disawang kae lho dalane gronjal-gronjal kebak watu gedhi- gedhi lan malah runggut kaya ngana kae.* | Look ahead. The road before us is rough and uneven, strewn with massive boulders tightly clustered together. |
| Warrior 2 | *Wooo hiya ya, lha terus piye?* | Ah, you are right indeed. What are we to do now? |
| Warrior 1 | *Kepiye, ca, pénaké liwat ngendi? Apa matur karo ratu bendarané disik?* | What say you, fellow warriors? Which path shall we take? Or shall we first report this matter to our commander? |
| Warrior 2 | *Apa bab kaya ngéné waé ndadak matur karo bendarané, mbok uwis ayo bareng-bareng ditandangi?* | Must we trouble our commander over such a petty matter? Let us resolve it ourselves. |
| Warrior 1 | *Lha nek arep bablas dalané runggut akeh prabatang gegrumbulan kaya mengkono kuwi. Apa ménggok dalan waé gawé dalan anyar?* | We cannot proceed any farther. The way ahead is filled with trees and dense undergrowth. Or shall we turn aside and clear a new path? |
| Warrior 2 | *Lha, nek menggok dalan arep liwat ngendi wong kepalang karo wit- witan sing gedhi gedhi kaya ngono ?* | How are we supposed to change direction when those enormous trees are standing in our way? |
| Warrior 1 | *Lha ya ditegori to!* | Why not just chop those big trees down? |
| Warrior 2 | *Apane sing ditegor?* | What did you just say? Cut down those trees? |
| Warrior 1 | *Ya, wit-wit sing gedhe kuwi ditegor digawe dalan ben isa nggo liwat bendarane.* | Exactly. Cut down those huge trees and clear a path so we can get through. |
| Warrior 2 | *Wo, lha, aja ngawur kowe, wit-witan sing gedhe kuwi akeh banget paedahe.* | No, don't do that. Those great trees serve many important purposes. |
| Warrior 1 | *Oh apa wae?* | What benefits do those great trees offer? |
| Warrior 2 | *Kanggo sumber penguripan merga biasané sak kiwa tengené uwit gedhe mau ana sendang utawa umbulé. Lan uga bisa kanggo njaga bumi iki ben ora gampang rusak lan ndadèkaké banjir gedhé merga wit- witan sing gedhé-gedhé mau mbok tegori mung kanggo gawe dalan.* | They are the very source of life, for water springs are often found around them. Great trees stand as protectors of the earth itself. Should we cut them down merely to open a path, floods will surely come. |
| Warrior 1 | *Oooh ngono, lha terus?* | Ah, I see now. Then what shall we do? |
| Warrior 2 | *Ngertèkna ya, oyot uwit sing kuwat iku bisa ngiket lemah supaya lemah kuwi bakoh lan ora gampang longsor. Gegodhongan kae bisa nyaring bledug lan nyirep hawa kang reged. Wit gedhe kuwi nyedhiyani papan panggonan lan pangan kanggo para sato wana, kaya manuk lan kewan-kewan liyane. Dadi yèn to isih ana wit-witan sing gedhé kuwi mratandakné yèn negarané déwé iki isih diayomi marang sing kuwasa. Coba pikiren yén nganti wit-witan mbok tegori awur- awuran ngono kuwi kira-kira kepiyé akibaté? Ana conto ing negara manca ana uwit gedhé sing umuré atusan tahun lan dadi sejarah crita turun tumurun. Merga ana tangané wong nggrathil wit kuwi mau ditegor sak gelemé banjur dadi perkara lan dadi cuthel sejarahé. Tinimbang mbabati wit-witan sing isih ana gunané, mbok luwung ayo ndandani dalan sing rusak-rusak kuwi.* | We know that the roots of those great trees are strong. They bind the soil firmly, keeping the land stable and preventing landslides. Their leaves filter dust and help keep the air we breathe clean. Great trees also provide shelter and serve as sources of food for birds and many other creatures. Thus, as long as such great trees continue to stand, they symbolize that our land remains under protection and care. Just imagine what would happen if we were to cut them down. There are many examples from other lands where great trees have been preserved as historical legacies, together with stories passed down through generations. There are also many accounts of people in distant countries who have felt the loss of their history after such great trees were cut down. Rather than felling these trees, it would be far wiser for us simply to repair the damaged road filled with stones. |
| Warrior 1 | *Lha awake déwé iki rak Prajurit to? Gaweané mung perang.* | Are we not warriors? The duty of warriors is but to fight. |
| Warrior 2 | *Lha kuwi ki nèk prajurit kana-kana, lha nek gone dewe ki ya béda. Kae lho grobak sing mburi kae isine bangsané Linggis, Pacul, Arit, Pécok lan sak panunggalane.* | That may be the way of warriors elsewhere, but we are different! Behind our ranks follow carts filled with tools, crowbars, hoes, sickles, and many others besides. |
| Warrior 1 | *Yaa, yén kaya mengkono ayo sing mendukul dipapras sing ledhok diurug. Wong sèwu bareng maju wong, satus bareng ambrus.* | Very well then. Let us level the uneven ground and fill in the deep hollows along the road. Come, let us work together in mutual cooperation. |
| Warrior 2 | *Wèh apik men, wong sèwu bareng maju wong satus bareng ambrus.*  *Lha nek sewidak?* | Excellent! A thousand warriors move forward, a hundred warriors charge ahead... but what about sixty? |
| Warrior 1 | *Wong sewidak bareng tumindak.* | Sixty? Sixty moving into action together! |
| Warrior 2 | *Wah elok tenan. Lha nek papat?* | Excellent! Now then... what about four? |
| Warrior 1 | *Lha nèk wong papat ya ceki waé…* | If there are only four? Well, that's just enough to start a gambling game! |
| Warrior 2 | *Wong papat bisa rikat. Wis ayo kanca mara mara mara.* | Four people can get the job done faster. Come, let us get to work! |
